# Supplementary material for: Development of A Land-River-Ocean Coupled Model for Compound Floods Jointly Caused by Heavy Rainfalls and Storm Surges in Large River Delta Regions
Source: Copernicus journal article supplement (doi:10.5194/egusphere-2024-3217), 2024-11-04
Supplement: Supplementary file 1 [file egusphere-2024-3217-supplement.pdf]

*Supplement of*

**Development of A Land-River-Ocean Coupled Model for Compound Floods Jointly Caused by Heavy Rainfalls and Storm Surges in Large River Delta Regions**

**Anyifang Zhang<sup>1</sup> and Xiping Yu<sup>2</sup>**

<sup>1</sup> Department of Hydraulic Engineering, Tsinghua University, Beijing, China.

<sup>2</sup> Department of Ocean Science and Engineering, Southern University of Science and Technology, Shenzhen, China.

**Correspondence:** Xiping Yu (yuxp@sustech.edu.cn)

This supporting information includes 18 figures and one table.

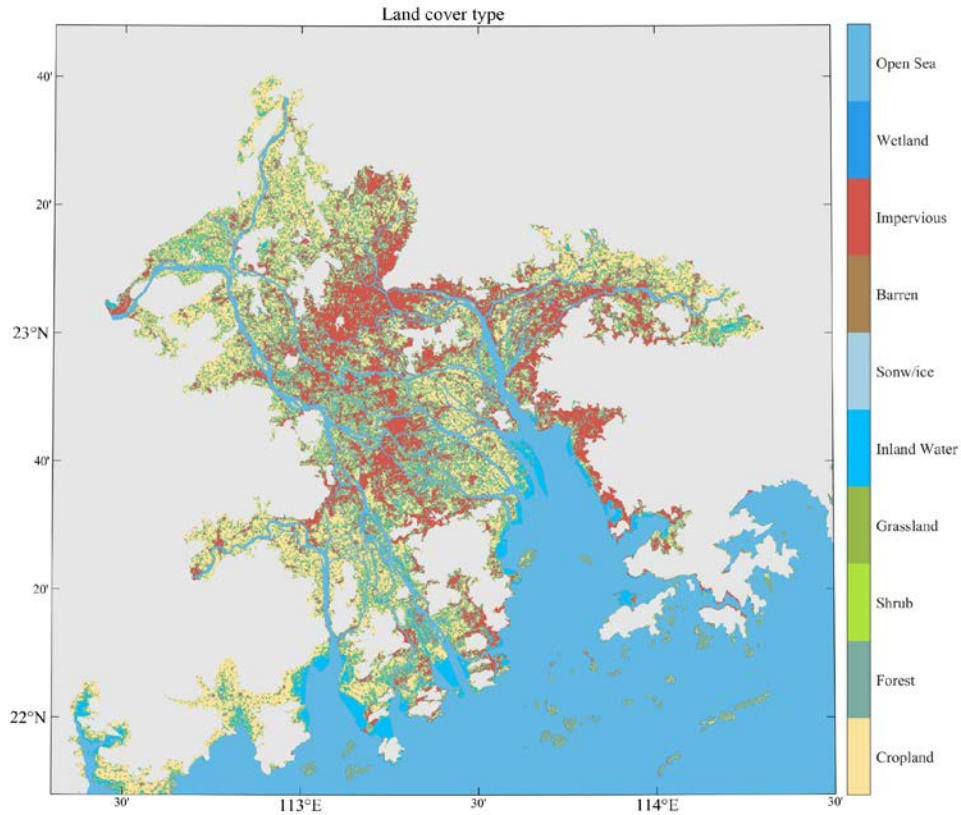

**Figure S1.** Distribution of landcover type in Pearl River delta region.

**Table S1.** Manning coefficient for different types of land cover.

| Type of Land Cover | Manning coefficient |
|--------------------|---------------------|
| Open sea           | 0.01                |
| Cropland           | 0.037               |
| Forest             | 0.1                 |
| Shrub              | 0.05                |
| Grassland          | 0.034               |
| Inland Water       | 0.02                |
| Snow               | 0.01                |
| Barren             | 0.09                |
| Impervious         | 0.15                |
| Wetland            | 0.01                |

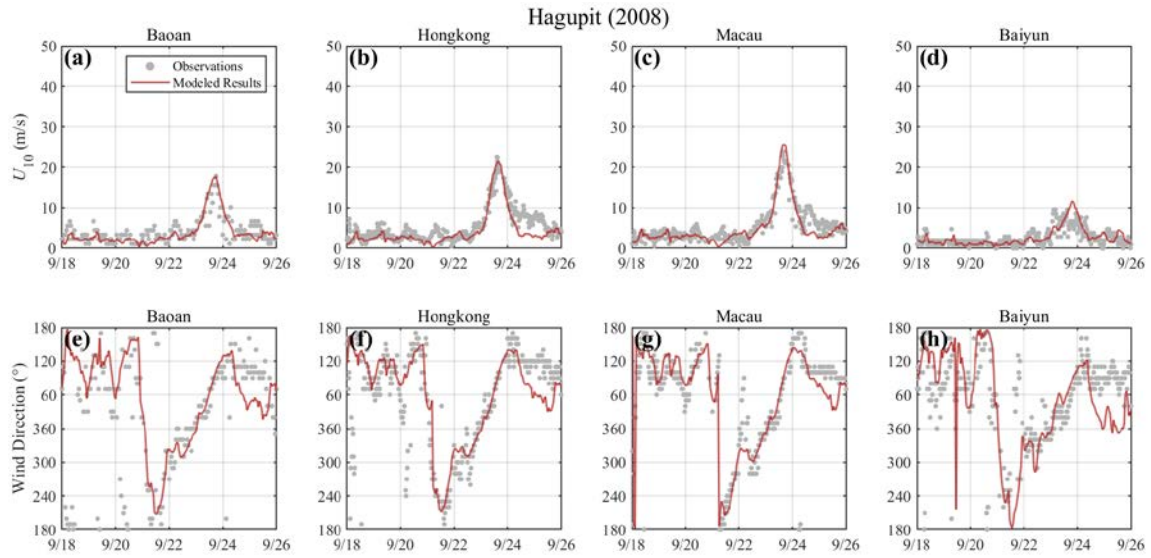

**Figure S2.** Comparison of computed and observed wind speed and wind direction during Typhoon Hagupit (2008) at four meteorological stations [I. Baoan, II. Hongkong, III. Macau, and IV. Baiyun].

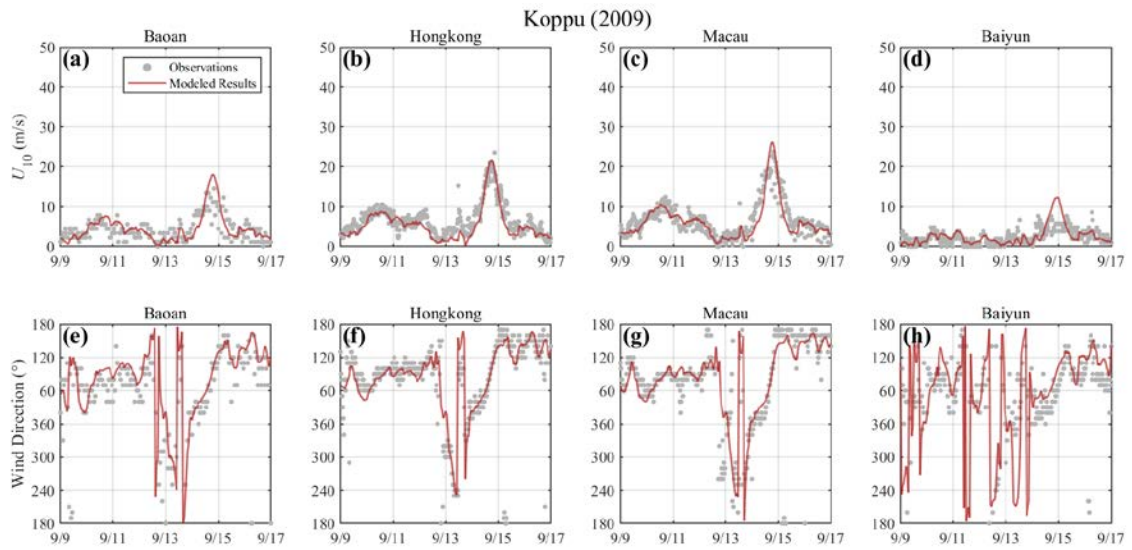

**Figure S3.** Same as **Figure S2** but during Typhoon Koppu (2009)

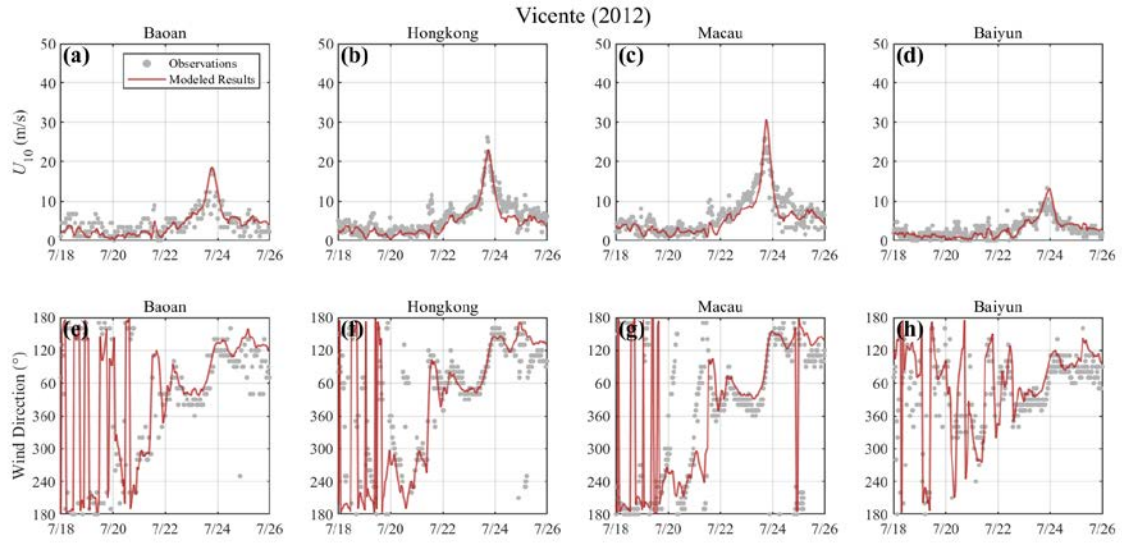

**Figure S4.** Same as **Figure S2** but during Typhoon Vicente (2012).

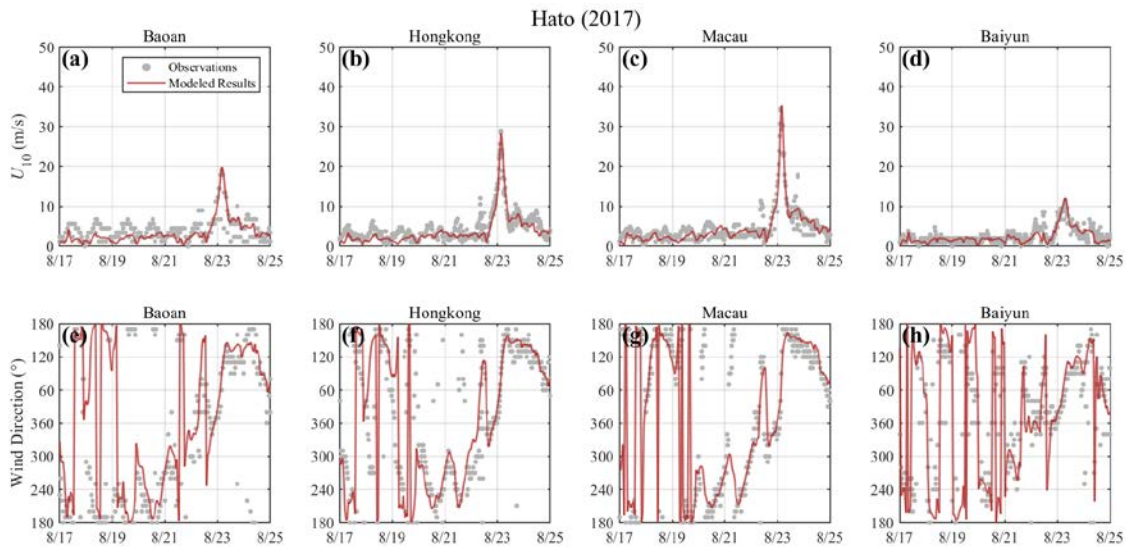

**Figure S5.** Same as **Figure S2** but during Typhoon Hato (2017).

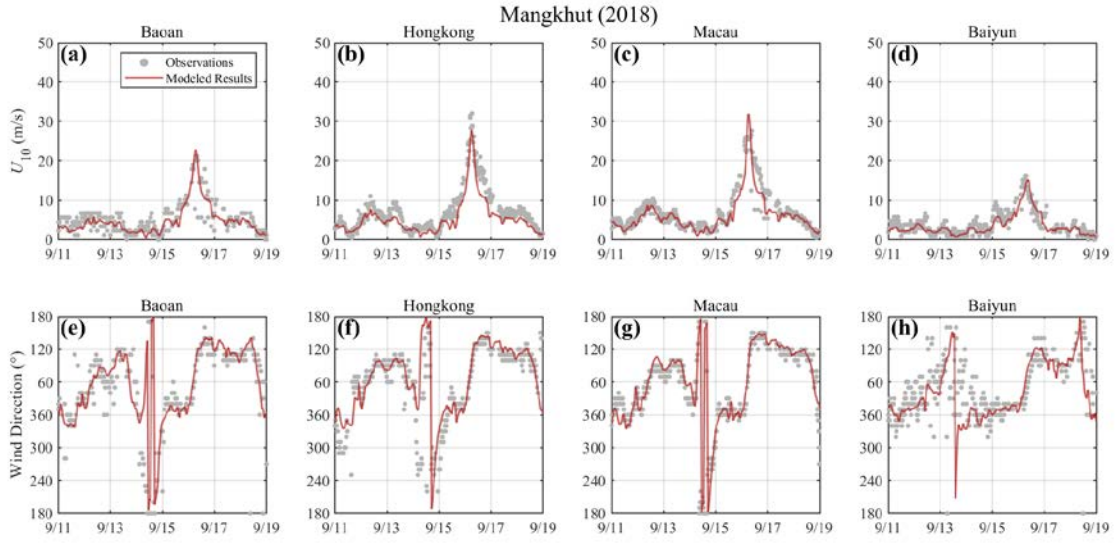

**Figure S6.** Same as **Figure S2** but during Typhoon Mangkhut (2018).

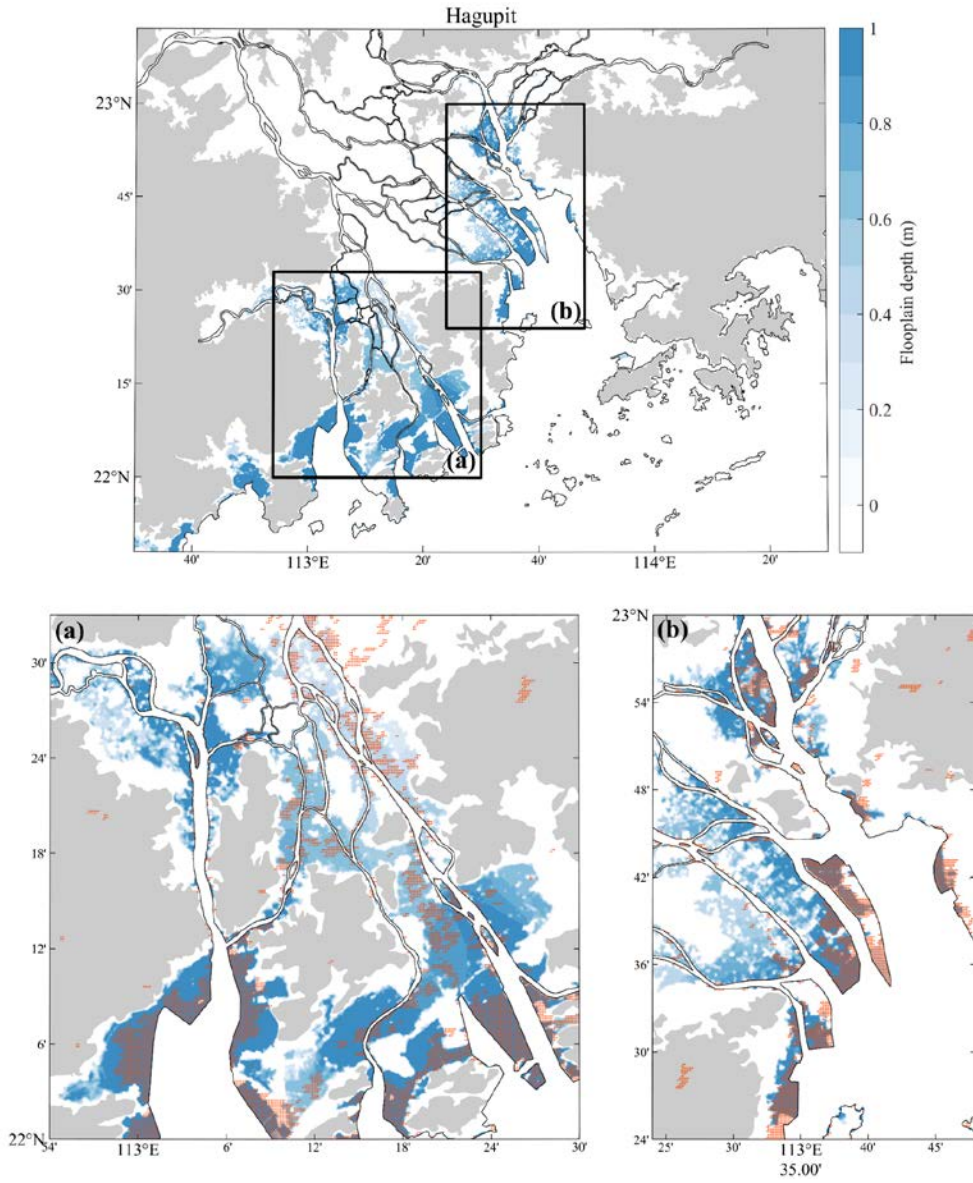

**Figure S7.** The contour plot (blue) of computed inundation depth caused by Typhoon Hagupit (2008). The orange dots are the inundation range estimated by MODIS datasets.

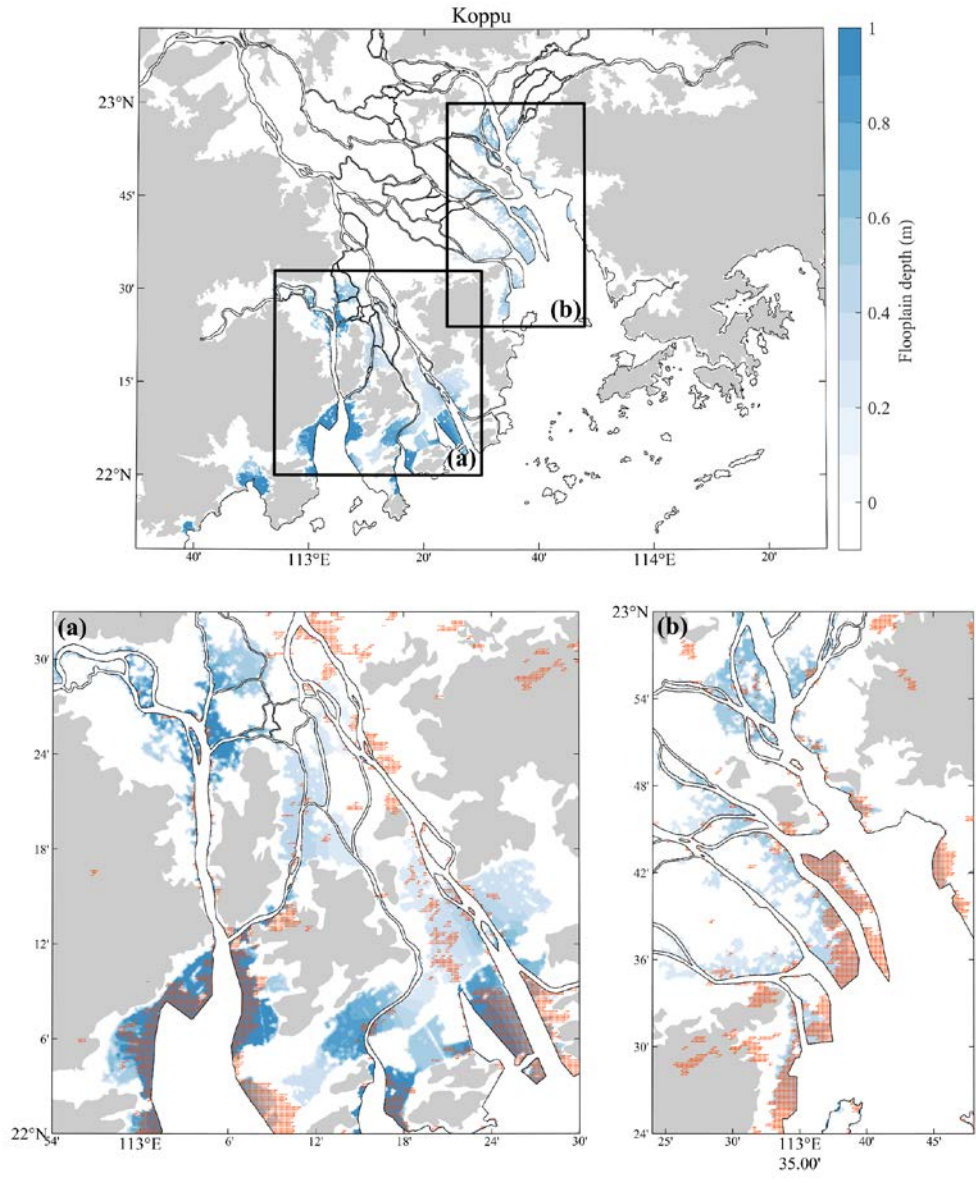

**Figure S8.** Same as **Figure S7** but caused by Typhoon Koppu (2009).

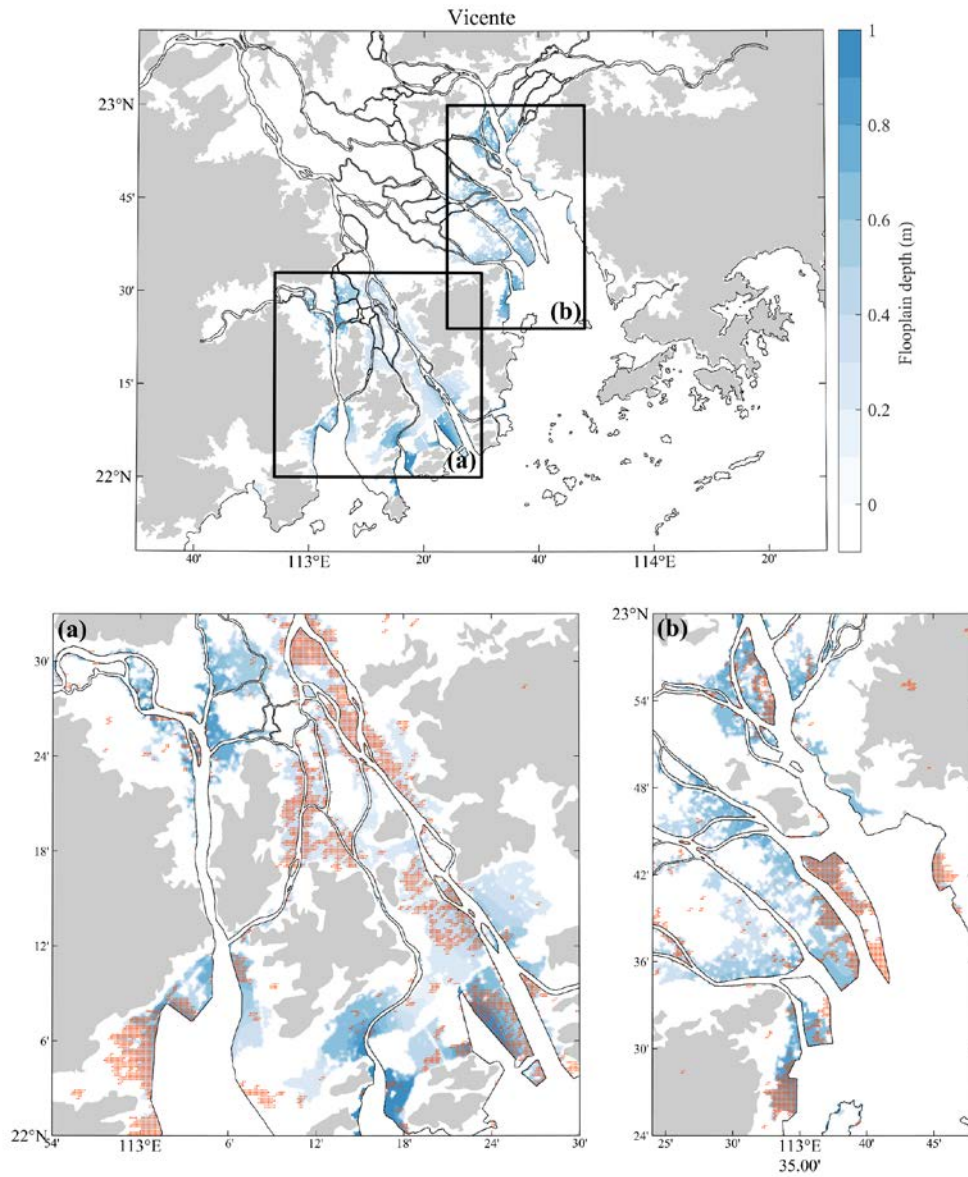

**Figure S9.** Same as **Figure S7** but caused by Typhoon Vicente (2012).



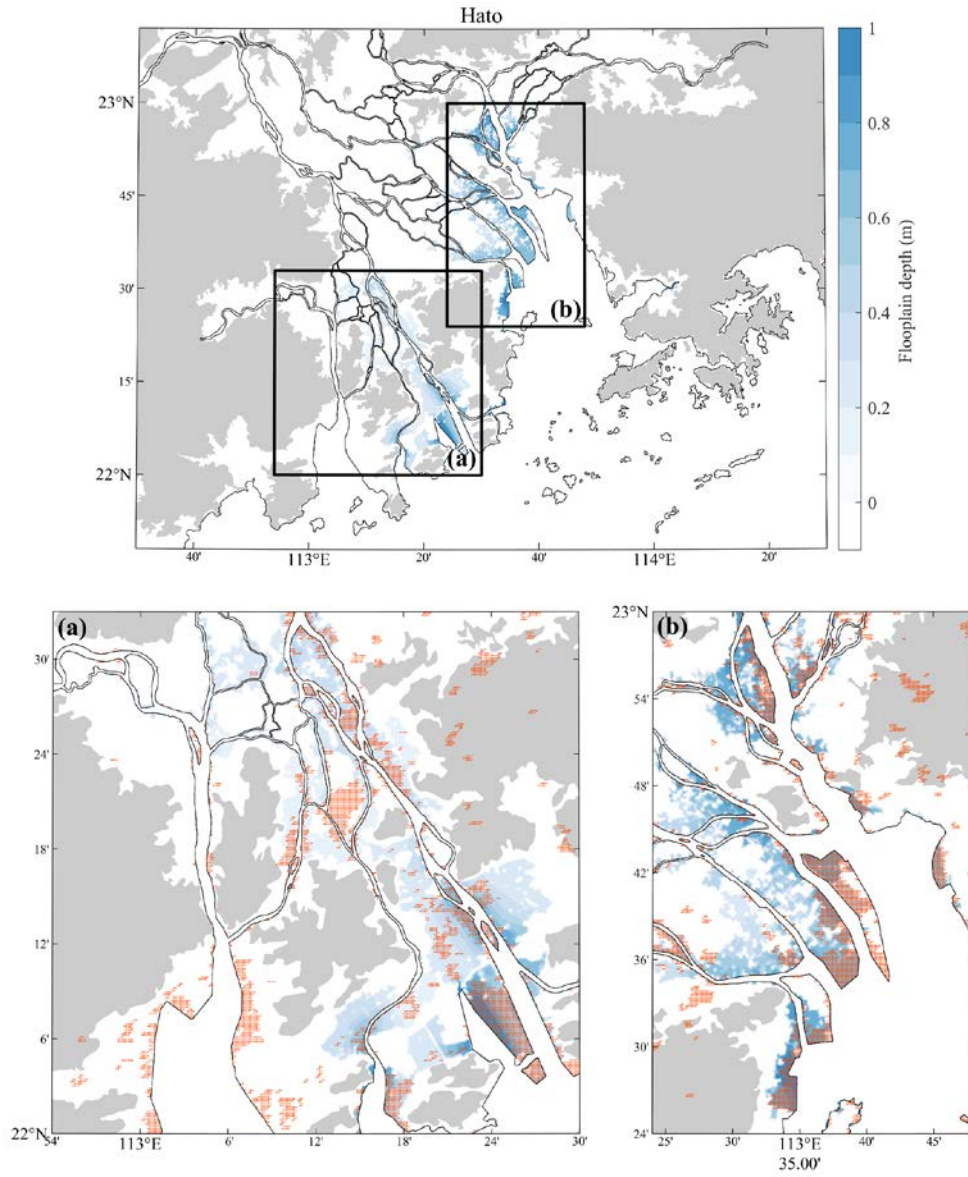

**Figure S10.** Same as **Figure S7** but for Typhoon Hato (2017).

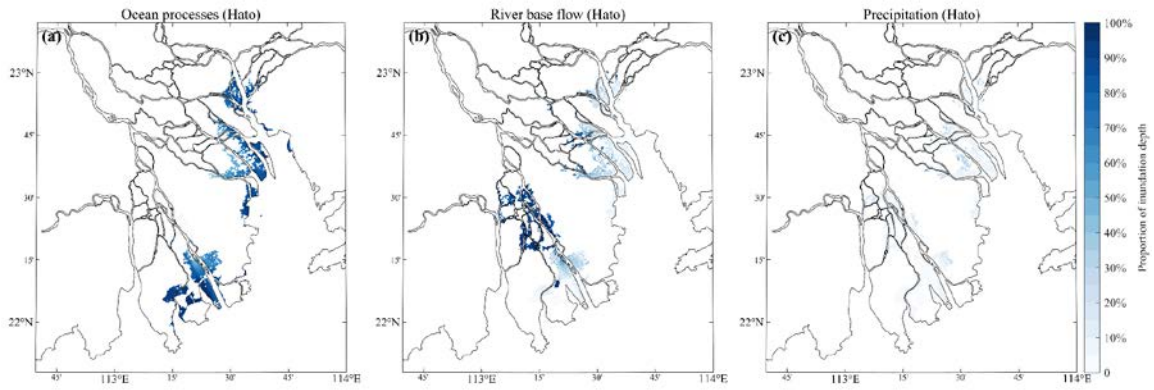

**Figure S11.** The distribution of inundation depth contributed by (a) the ocean processes, (b) the river base flow, and (c) the precipitation during Typhoon Hagupit (2008).

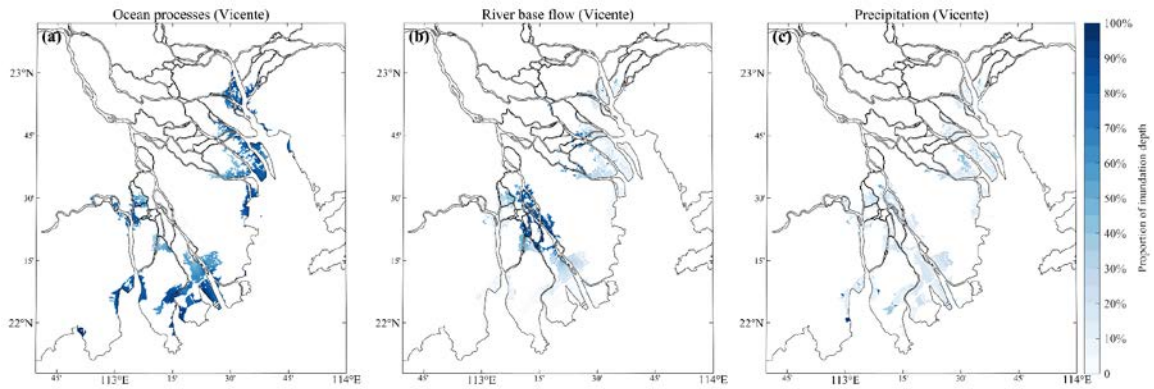

**Figure S12.** Same as **Figure S11** but during Typhoon Koppu (2009).

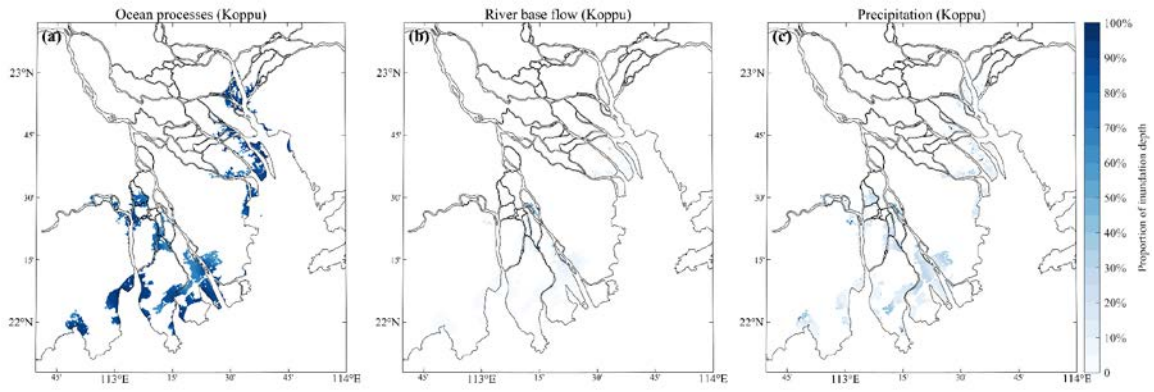

**Figure S13.** Same as **Figure S11** but during Typhoon Vicente (2012).

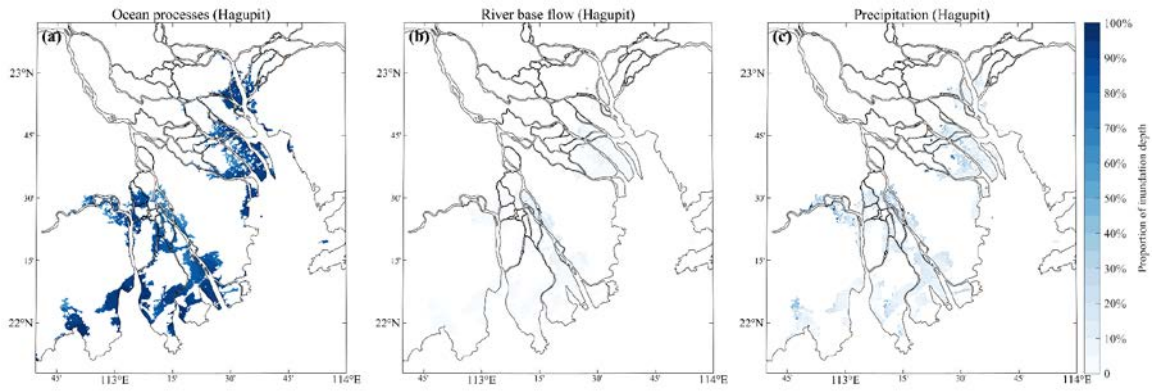

**Figure S14.** Same as **Figure S11** but during Typhoon Hato (2017).

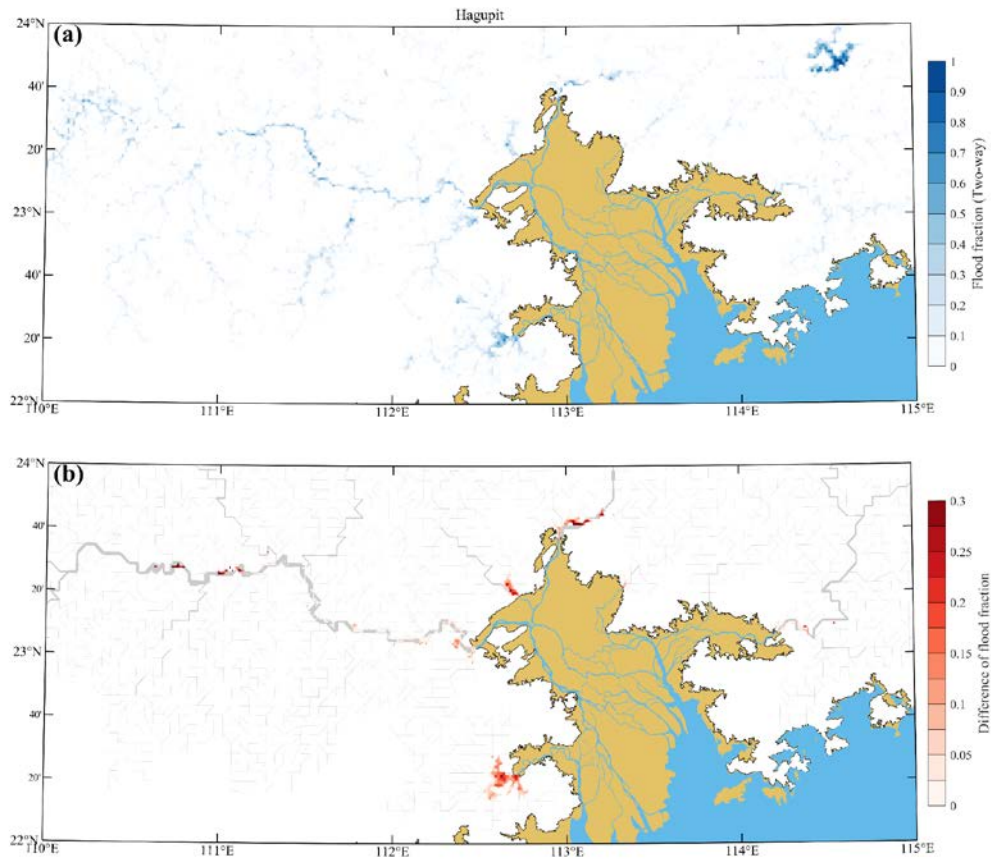

**Figure S15.** (a) The fraction of flooding area during Typhoon Hagupit (2008) estimated by the CaMa-flood model with two-way coupling approach. (b) The difference of the fraction of flooding area between the two-way and one-way coupling approaches. The river channels are marked with gray lines, with the width of the river channel indicated by the line thickness.

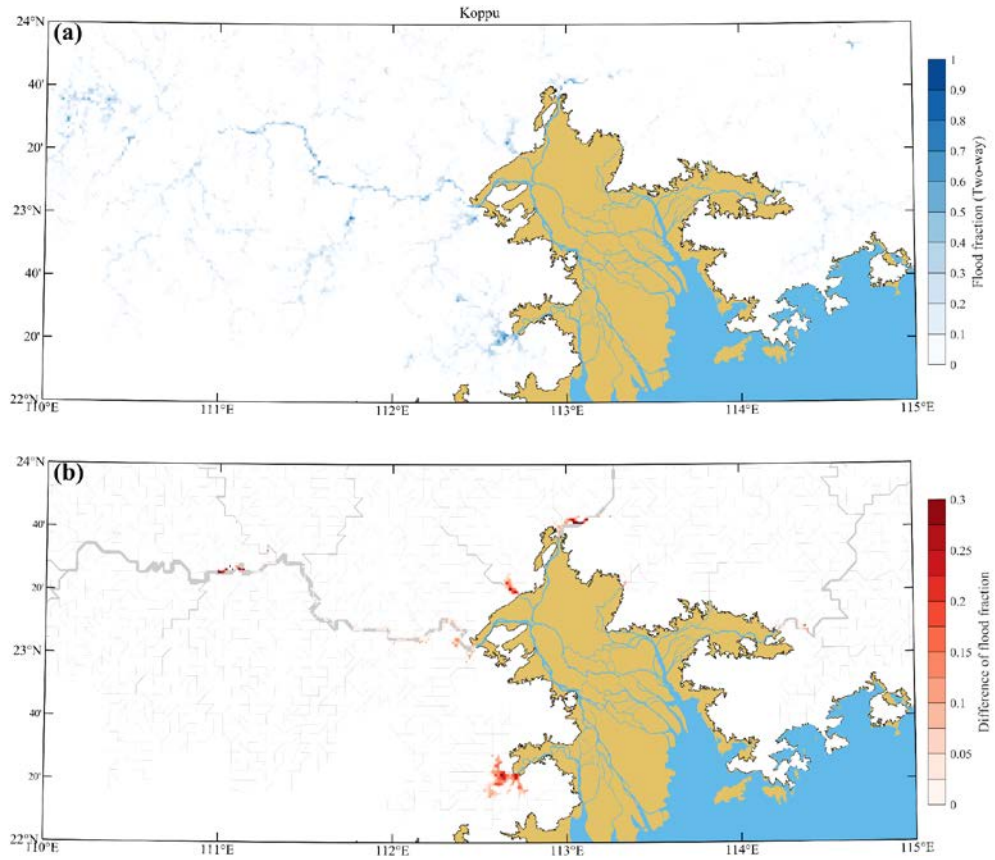

**Figure S16.** Same as **Figure S15** but during Typhoon Koppu (2009).

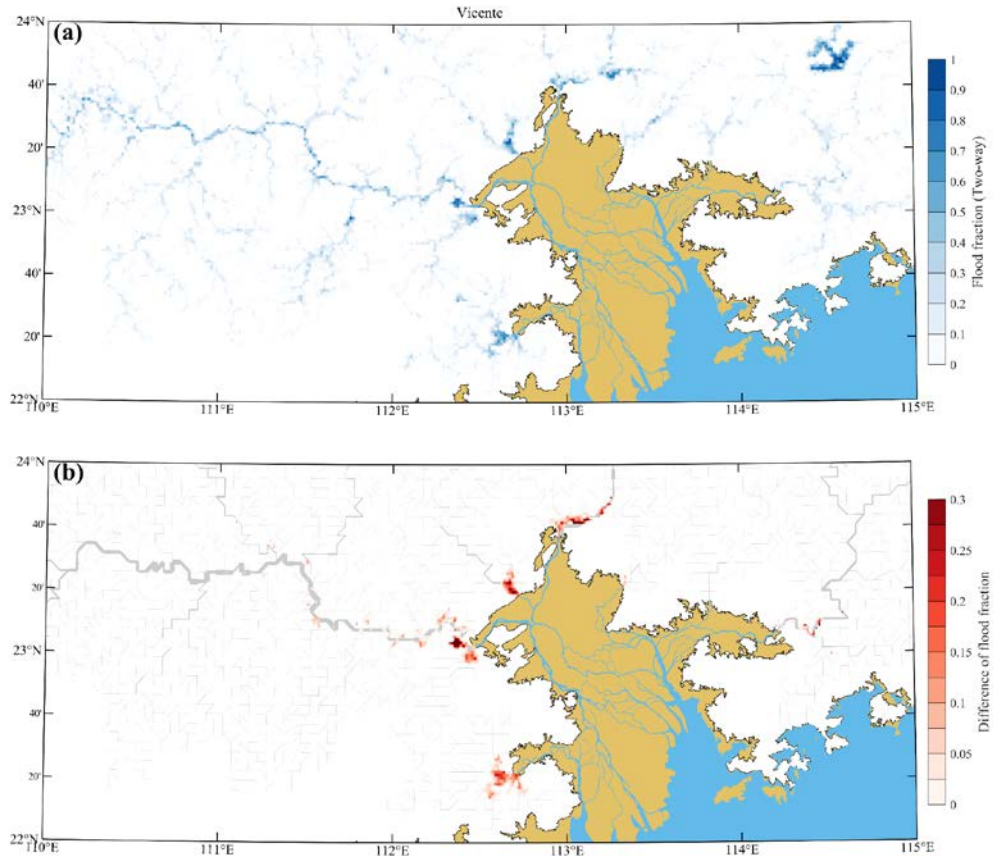

**Figure S17.** Same as **Figure S15** but during Typhoon Vicente (2012).

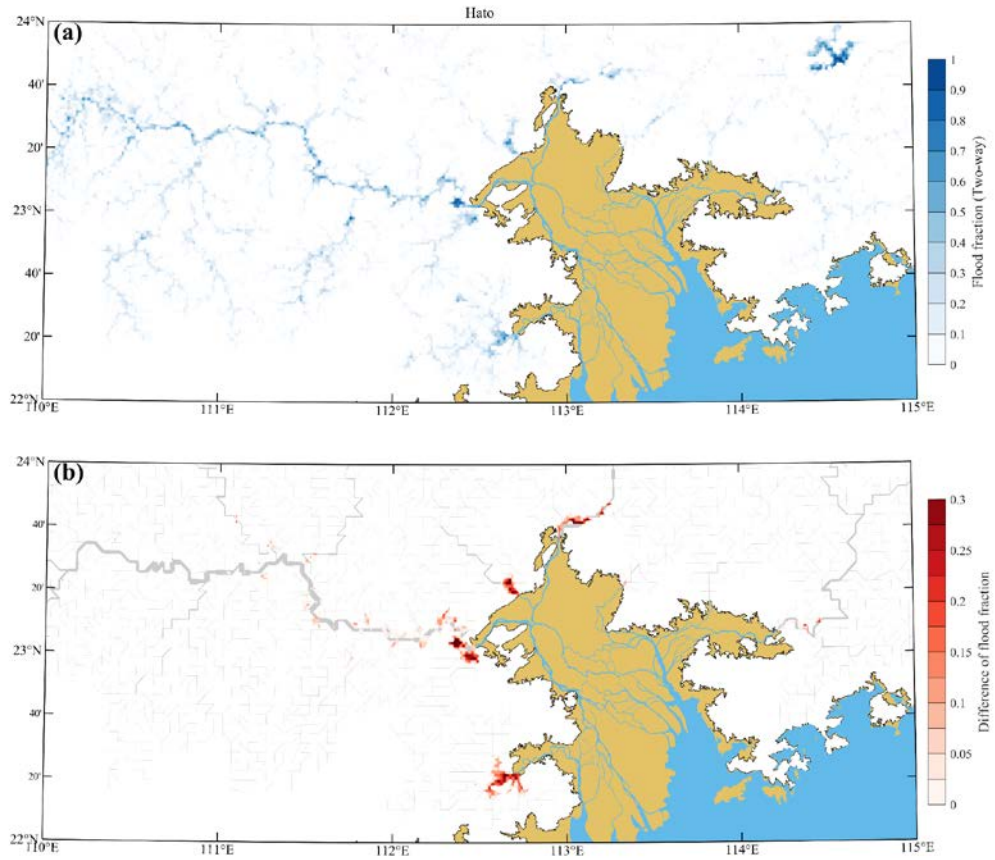

**Figure S18.** Same as **Figure S15** but for Typhoon Hato (2017).
